# Supplementary material
Source: Research Square preprint supplement (doi:10.21203/rs.3.rs-10265316/v1)
Supplement: Supplementary file 1 [file 0723d5015fc646b3b93e6dbe.xlsx]

## Sheet: Sheet1
Size rank	Country	Country code	Start	End	Definition max difference (months)	Definition count	Does the source define water / hydrological year explicitly?	Citation	Source	Reason	Notes
1	Russia	RU	1st Oct	30th Sep	0	1	yes		Temporal and spatial variations in maximum river discharge from a new Russian data set - Shiklomanov - 2007 - Journal of Geophysical Research: Biogeosciences - Wiley Online Library
2	Canada	CA	1st Oct	30th Sep	0	1	yes		The water balance climatology of the Mackenzie basin with reference to the 1994/95 water year: Atmosphere-Ocean: Vol 40, No 2	Lowest Discharge
3	China (Loess Plateau)	CN	1st Jul	30th Jun	0	1	yes		The water year based on minimizing the terrestrial water storage variation and its validity - ScienceDirect	∆S
4	United States of America	US	1st Oct	30th Sep	0	1	yes		USGS--Water Resources of the United States	Reflects winter snow accumulation as well as summer rainfall.
5	Brazil	BR	1st Sep	31st Aug	0	1	yes		ESSD - CAMELS-BR: hydrometeorological time series and landscape attributes for 897 catchments in Brazil	No reason given
6	Australia	AU	1st Jul	30th Jun	0	1	yes		Water in Australia: Water Information: Bureau of Meteorology	minimum average monthly discharge over the period of the data
7	India	IN	1st Jun	31st May	0	1	yes		ESSD - CAMELS-IND: hydrometeorological time series and catchment attributes for 228 catchments in Peninsular India	No reason given
8	Argentina	AR	1st Jul	30th Jun	2	2	yes		2019Spring_TechPaper.pdf	No reason given
	Argentina (Northern Patagonia Region)	AR	1st Sep	31st Aug	2	2	yes		Navigating the Water-Energy Governance Landscape and Climate Change Adaptation Strategies in the Northern Patagonia Region of Argentina | MDPI	No reason given
9	Kazakhstan (Lake Balkhash Basin)	KZ	1st Oct	30th Sep	0	1	yes		Runoff variations in Lake Balkhash Basin, Central Asia, 1779–2015, inferred from tree rings | Climate Dynamics	Snow Accumulation starts
10	Algeria (extrapolation)	DZ	1st Oct	30th Sep	0	1	yes		Mapping drought characteristics in northern Algerian Basins using the ERA5-Land dataset | Scientific Reports	Rainy season starts in Oct
11	Democratic Republic of Congo (Kinshasa)	CD	1st Aug	31st Jul	4	2	yes		Opportunities for hydrologic research in the Congo Basin - Alsdorf - 2016 - Reviews of Geophysics - Wiley Online Library	low discharge
	Democratic Republic of Congo (Oubangui)	CD	1st Apr	31st Mar	4	2	yes		Opportunities for hydrologic research in the Congo Basin - Alsdorf - 2016 - Reviews of Geophysics - Wiley Online Library	low discharge
12	Greenland	GL	1st Sep	31st Aug	0	1	yes		Mass balance | PROMICE - GC-NET	Melt Year
13	Saudi Arabia	SA	1st Oct	30th Sep	0	1	yes		Frontiers | Application of Time-Variable Gravity to Groundwater Storage Fluctuations in Saudi Arabia	They had April as the peak TWES, so half a year after that should be the start of the lowest TWS, but just as well could be NA
14	Mexico	MX	1st Jun	31st May	0	1	yes		Distributed Hydrologic Modeling in Northwest Mexico Reveals the Links between Runoff Mechanisms and Evapotranspiration	Lowest level of groundwater storage
15	Indonesia	ID	1st Aug	31st Jul	0	1	yes		Determination of rainy season onset and cessation based on a flexible driest period	Convention
16	Sudan	SD	1st Jun	31st May	0	1	yes		Comparison of artificial neural networks and autoregressive model for inflows forecasting of Roseire	Just before the rainy season
17	Libya	LY	1st Sep	31st Aug	0	1	yes		Trends and patterns in the climate of Libya (1945-2010)	No reason given
18	Iran	IR	1st Oct	30th Sep	0	1	yes		Comparison of Annual Moisture Flux Variability during Dry and Wet Years over Iran	”Due to the climate conditions in Iran, it rains mostly in winter and spring, which starts from late September to December.” Caspian sea is an exception
19	Mongolia	MN	1st Aug	31st Jul	2	2	yes		Role of Surface Melt and Icing Events in Livestock Mortality across Mongolia’s Semi-Arid Landscape	No reason given
		MN	1st Oct	30th Sep	2	2	yes		Merging Indigenous Knowledge Systems and Station Observations to Estimate the Uncertainty of Precipitation Change in Central Mongolia	No reason given
20	Peru	PE	1st Oct	30th Sep	0	1	yes		Effect of hydrologic modification and interbasin water transfers on streamflow metrics affecting aquatic ecology in Arequipa, Peru	No reason given
21	Chad	TD	1st Jul	30th Jun	0	1	no		Recent changes in Lake Chad: Observations, simulations and management options (1973–2011)	Rainy season starts	Inferred, does not use term water year
22	Niger	NE	1st Jun	31st May	0	1	no		Change in Sahelian Rivers hydrograph: The case of recent red floods of the Niger River in the Niamey region	River Niger starts to rise as the rainy season starts (migh not imply rain in Niger)	Inferred, does not use term water year
23	Angola	AO	1st Aug	31st Jul	3	2	no		Defining the Angolan Highlands Water Tower, a 40 plus-year precipitation budget of the headwater catchments of the Okavango Delta	Rainy season starts	Does not directly reference water year, estimated from rainfall patterns
		AO	1st Nov	31st Oct	3	2	yes		Drivers of seasonal rainfall variability over the Angolan and Namibian plateaus	No reason given
24	Mali	ML	1st May	30th Apr	0	1	no		Rainfall regime across the Sahel band in the Gourma region, Mali	Rainy season starts	Does not directly reference water year, estimated from rainfall patterns
25	South Africa	ZA	1st Sep	31st Aug	6	3	no		Determining the utility of a percentile-based wet-season start- and end-date metrics across South Africa	Depends heavily on the part of the country . (Summer rain zone, Sep-Aug; winter rain zone, Mar-Feb; year round zone; Jan-Dec)	Does not directly reference water year, estimated from rainfall patterns
		ZA	1st Mar	28th Feb	6	3	no		Determining the utility of a percentile-based wet-season start- and end-date metrics across South Africa	Depends heavily on the part of the country . (Summer rain zone, Sep-Aug; winter rain zone, Mar-Feb; year round zone; Jan-Dec)	Does not directly reference water year, estimated from rainfall patterns
		ZA	1st Jan	31st Dec	6	3	no		Determining the utility of a percentile-based wet-season start- and end-date metrics across South Africa	Depends heavily on the part of the country . (Summer rain zone, Sep-Aug; winter rain zone, Mar-Feb; year round zone; Jan-Dec)	Does not directly reference water year, estimated from rainfall patterns
26	Colombia	CO	1st Feb	31st Jan	6	2	no		Seasonality of Rainfall in Colombia	Depends heavily on the part of the country	Does not directly reference water year, estimated from rainfall patterns
		CO	1st Aug	31st Jul	6	2	no		Seasonality of Rainfall in Colombia	Depends heavily on the part of the country	Does not directly reference water year, estimated from rainfall patterns
27	Ethiopia	ET	1st Mar	28th Feb	0	1	no		Temporal and spatial changes of rainfall and streamflow in the Upper Tekezē–Atbara river basin, Ethiopia	Rainy season starts	Inferred, does not use term water year
28	Bolivia	BO	1st Aug	30th Jun	0	1	yes		Glacier Mass Balance and Catchment-Scale Water Balance in Bolivian Andes	Minimum discharge in August	Read from a time scale of a plot
29	Mauritania	MR	1st Jun	31st May	0	1	no		Rainfall Variability and Trend Analysis of Rainfall in West Africa (Senegal, Mauritania, Burkina Faso)	Rainy season starts	Does not directly reference water year, estimated from rainfall patterns
30	Egypt	EG	1st Jul	31st May	0	1	no		Hydrology of the Nile and Ancient Agriculture	Nile discharge starts to increase.	Does not directly reference water year, estimated from rainfall patterns
31	Tanzania	TZ	1st Nov	31st Oct	0	1	no		Analysis of spatial and temporal trend of hydro-climatic parameters in the Kilombero River Catchment, Tanzania	Minimum discharge in November	Read from a plot
32	Nigeria	NG	1st Mar	28th Feb	1	2	no		Assessing changes in the rainfall regime in Nigeria between 1961 and 2004	Rainy season starts in the southernmost Nigeria (Before that, all of the country is in dry season)	Does not directly reference water year, estimated from rainfall patterns
		NG	1st Apr	31st Mar	1	2	no		Dam operations, local rainfall, changing settlement growth pattern and flooding in the Niger Delta, Nigeria	Minimum discharge in April	Read from a plot
33	Venezuela	VE	1st Feb	31st Jan	0	1	no		TREND AND SEASONALITY ASSESSMENT FOR MONTHLY PRECIPITATION IN VENEZUELA	Minimum rainfall in february	Does not directly reference water year, estimated from rainfall patterns
34	Pakistan	PK	1st Oct	30th Sep	0	1	yes		Anthropogenic and climatic drivers of the 2022 mega-flood in Pakistan	For mountainous Pakistan, snow storage and rainfall taken into consideration
35	Namibia	NA	1st Nov	31st Oct	0	1	no		Integrating Hydrological Modelling and Ecosystem Functioning for Environmental Flows in Climate Change Scenarios in the Zambezi River (Zambezi Region, Namibia)	Rainy season starts, Zambezi region	Does not directly reference water year, estimated from rainfall patterns
36	Mozambique	MZ	1st Oct	30th Sep	0	1	no		The influence of tropical and subtropical modes of climate variability on precipitation in Mozambique	Rainy season starts	Does not directly reference water year, estimated from rainfall patterns
37	Turkey	TR	1st Oct	30th Sep	0	1	yes		Meteorological and hydrological drought analysis of the Seyhan−Ceyhan River Basins, Turkey	No reason given
38	Chile	CL	1st Apr	31st Mar	0	1	yes		The CAMELS-CL dataset: catchment attributes and meteorology for large sample studies – Chile dataset	No reason given
39	Zambia	ZM	1st Jul	30th Jun	3	2	yes		Interannual Hydroclimatic Variability of the Lake Mweru Basin, Zambia	North Zambia, rain season starts
		ZM	1st Oct	30th Sep	3	2	yes		A landscape hydrology approach to inform sustainable water resource management under a changing environment. A case study for the Kaleya River Catchment, Zambia	West Zambia, rain season starts
40	Myanmar	MM	1st May	30th Apr	0	1	yes		Multimodelling approach to the assessment of climate change impacts on hydrology and river morphology in the Chindwin River Basin, Myanmar	Monsoon starts
41	Afghanistan	AF	1st Oct	30th Sep	0	1	yes		The 150-Year Itch: Afghanistan-Iran Hydropolitics Over the Helmand/Hirmand River	Based on a treaty (likely based on rainfall and glacier/snow melt patterns)
42	South Sudan	SS	1st Feb	31st Jan	0	1	no		Flood Pulsing in the Sudd Wetland: Analysis of Seasonal Variations in Inundation and Evaporation in South Sudan	Lowest discharge of white Nile is in February (Before Sudd wetlands), Also Dec, Jan Feb are the least raiy months.	Does not directly reference water year, estimated from discharge patterns
43	France	FR	1st Oct	30th Sep	0	1	yes		CAMELS-FR dataset: a large-sample hydroclimatic dataset for France to explore hydrological diversity and support model benchmarking	Likely based on rainfall and glacier/snow melt patterns
44	Somalia	SO	1st Feb	31st Jan	0	1	no		Water balance of the Juba and Shabelle River basins the Horn of Africa	Minimum discharge occurs in February	Does not directly reference water year, estimated from discharge patterns
45	Central African Republic	CF	1st Apr	31st Mar	0	1	yes		Spatiotemporal Variability in the Hydrological Regimes and Water Resources of the Ouham River Basin at Batangafo, Central African Republic	No reason given
46	Madagascar	MG	1st Oct	30th Sep	0	1	no		Interannual variability of rainfall characteristics over southwestern Madagascar	September is the driest month	Does not directly reference water year, estimated from rainfall patterns
47	Botswana	BW	1st Jul	30th Jun	0	1	no		Assessment of the onset, cessation, and duration of rainfall season over Botswana	Driest part of the year	Does not directly reference water year, estimated from rainfall patterns
48	Kenya	KE	1st Mar	28th Feb	0	1	yes		Evaluation of spatiotemporal variability of rainfall over Kenya from 1979 to 2017	February is the driest month
49	Ukraine	UA	1st Sep	31st Aug	0	1	no		Trends in the Water Regime Changes of the Styr River (Lutsk Hydrological Station) During 1963-2022 Period	Lowest discharge occurs in August-September	Does not directly reference water year, estimated from discharge patterns
50	Thailand	TH	1st Nov	31st Oct	0	1	yes		Effects of landuse change on the hydrologic regime of the Mae Chaem river basin, NW Thailand	Beginning of baseflow period
51	Spain	ES	1st Aug	31st Jul	0	1	no		Precipitation trends in Spanish hydrological divisions, 1946–2005	July is the month with least rainfall	Does not directly reference water year, estimated from rainfall patterns
52	Turkmenistan	TM	1st Nov	31st Oct	0	1	no		Spatial and seasonal variations in the water quality of the Amu Darya River (Central Asia)	Minimum discharge of Amu Darya river (in the autumn), the most important sourceof water in Turkmenistan	Does not directly reference water year, estimated from discharge patterns
53	Cameroon	CM	1st Jan	31st Dec	0	1	no		Total Water Storage Change in Cameroon: Calculation, Variability and Link with Onset and Retreat Dates of the Rainy Season	Rainfall minimum is in December or January	Does not directly reference water year, estimated from rainfall patterns
54	Papua New Guinea	PG	1st Oct	31st Sep	0	1	no		ENSO-related rainfall changes over the New Guinea region	Start of the wet season, Port Moresby. Due to mountains, the rainfall patterns depend on the location and prevailing winds.	Does not directly reference water year, estimated from rainfall patterns
55	Yemen	YE	1st Jan	31st Dec	0	1	no		Precipitation analysis and agricultural water availability in the Southern Highlands of Yemen	January is the month with lowest rainfall	Does not directly reference water year, estimated from rainfall patterns
56	Sweden	SE	1st Oct	30th Sep	0	1	yes		Drought hazard assessment across Sweden's diverse hydro-climatic regimes	No reason given
57	Uzbekistan	UZ	1st Nov	31st Oct	0	1	no		Spatial and seasonal variations in the water quality of the Amu Darya River (Central Asia)	Minimum discharge of Amu Darya river (in the autumn), the most important sourceof water in Turkmenistan	Does not directly reference water year, estimated from discharge patterns
58	Morocco	MA	1st Sep	31st Aug	0	1	yes		Trend analysis of rainfall and drought over the Oum Er-Rbia River Basin in Morocco during 1970–2010	No reason given
59	Iraq	IQ	1st Oct	30th Sep	0	1	no		Shatt al Arab River system under escalating pressure: a preliminary exploration of the issues and options for mitigation	Flood peaks are driven by winter rains and snowmelt
60	Paraguay	PY	1st Jul	30th Jun	0	1	no		Further evidence of changes in the hydrological regime of the River Paraguay: part of a wider phenomenon of climate change?	July is the month with least rainfall	Does not directly reference water year, estimated from rainfall patterns
61	Zimbabwe	ZW	1st Oct	30th Sep	0	1	yes		Effect of temporal rainfall distribution and soil type on soil moisture and runoff generation in semi-arid Zimbabwe	Rainy season starts
62	Norway	NO	1st Sep	31st Aug	0	1	yes		Hydrological impacts of climate change on small ungauged catchments – results from a global climate model–regional climate model–hydrologic model chain	No reason given
63	Japan	JP	1st Jun	31st May	0	1	yes		Effect of Snow Cover Conditions on the Hydrologic Regime: Case Study in a Pluvial-Nival Watershed, Japan	After snowmelt floods, summer period has less rainfall, Niigata Prefecture mountains.
64	Germany	DE	1st Oct	30th Sep	0	1	yes		CAMELS-DE: hydro-meteorological time series and attributes for 1582 catchments in Germany	No reason given
65	Republic of the Congo	CG	1st Aug	31st Jul	4	2	yes		Opportunities for hydrologic research in the Congo Basin	Low discharge timing of Congo river at Brazzaville & Kinshasa
		CG	1st Apr	31st Mar	4	2	yes		Opportunities for hydrologic research in the Congo Basin	Low discharge timing of Oubangui river at Bangui
66	Finland	FI	1st Sep	31st Aug	2	3	yes		Climate Teleconnections Influencing Historical Variations, Trends, and Shifts in Snow Cover Days in Finland | Earth Systems and Environment	No reason given
		FI	1st Oct	30th Sep	2	3	yes		An approach to improve direct runoff estimates and reduce uncertainty in the calculated groundwater component in water balances of large lakes	No reason given
		FI	1st Nov	31st Oct	2	3	yes		Effects of clear-cutting on annual and seasonal runoff from a boreal forest catchment in eastern Finland	No reason given
67	Vietnam	VN	1st Apr	31st Mar	0	1	no		Quantifying human impacts on hydrological drought using a combined modelling approach in a tropical river basin in central Vietnam	Low discharge timing	Does not directly reference water year, estimated from discharge patterns
68	Malaysia	MY	1st Aug	31st Jul	0	1	no		Long-term variations in water storage in Peninsular Malaysia	Low groundwater storage	Does not directly reference water year, estimated from water groundwater storage
69	Ivory coast	CI	1st Jan	31st Dec	0	1	no		Tropical Atlantic and rainfall variability in Côte d'Ivoire	January is the month with lowest rainfall	Does not directly reference water year, estimated from rainfall patterns
70	Poland	PL	1st Nov	31st Oct	0	1	yes		Detection of changes in flow regime of rivers in Poland	No reason given
71	Oman	OM	1st Oct	30th Sep	0	1	yes		Groundwater recharge estimation in arid hardrock-alluvium aquifers using combined water-table fluctuation and groundwater balance approaches	No reason given
72	Italy	IT	1st Oct	30th Sep	0	1	yes		Monitoring Hydrological Processes for Land and Water Resources Management in a Mediterranean Ecosystem: The Alento River Catchment Observatory	Convention
73	Philippines	PH	1st Apr	31st Mar	0	1	no		A study on impact of climate variability/change on water resources in the Philippines	Defines a rain-year, which starts at the beginning of the rainy season
74	Ecuador	EC	1st Sep	31st Aug	0	1	yes		El Niño and prediction of anomalous monthly rainfalls in Ecuador	Start of the water year for Ecuadorian coastal area, no further reason given.
75	Burkina Faso	BF	1st Mar	28th Feb	0	1	no		Climate Variability and Groundwater Response: A Case Study in Burkina Faso (West Africa)	Start of early rain season	Does not directly reference water year, estimated from rainfall patterns
76	New Zealand	NZ	1st Jul	30th Jun	0	1	yes		Storylines of future drought in the face of uncertain rainfall projections: a New Zealand case study	No reason given
77	Gabon	GA	1st Jan	31st Dec	0	1	yes		Long-Term Hydrological Variations of the Ogooué River Basin	Splits year into four hydrological seasons, the division is not explained further.
78	Guinea	GN	1st May	30th Apr	0	1	no		Variability and trends of the rainy season in West Africa with a special focus on Guinea-Bissau	Start of the rainy season, does not use term water year
79	United Kingdom	GB	1st Oct	30th Sep	0	1	yes		CAMELS-GB: hydrometeorological time series and landscape attributes for 671 catchments in Great Britain	No reason given
80	Uganda	UG	1st Jul	30th Jun	0	1	no		Sources of uncertainty in climate change impacts on river discharge and groundwater in a headwater catchment of the Upper Nile Basin, Uganda	Low discharge timing	Does not directly reference water year, estimated from discharge patterns
81	Ghana	GH	1st Mar	28th Feb	0	1	yes		Overview of hydrological and climatic studies in Africa: The case of Ghana	No reason given
82	Romania	RO	1st Oct	30th Sep	0	1	yes		Estimation of climatic and anthropogenic contributions to streamflow change in southern Romania	No reason given
83	Laos	LA	1st Apr	31st Mar	0	1	yes		Conflict, migration and land-cover changes in Indochina: a hydrological assessment	No reason given
84	Guyana	GY	1st Dec	30th Nov	0	1	no		Fluctuations in the monthly discharge of Guyana Shield rivers, related to Pacific and Atlantic climate variability	Minimum discahrge in November	Read from a plot, that was using december-november as timescale. Water year not mentioned explicitly
85	Belarus	BY	1st Sep	31st Aug	0	1	yes		Climate-induced mortality of spruce stands in Belarus	No reason given
86	Kyrgyzstan	KG	1st Oct	30th Sep	0	1	no		Current and future water balance of a mountain subcatchment of Issyk-Kul Lake, Tien Shan range, Kyrgyzstan	Defines a ”glacier year”, no further reason given
87	Senegal	SN	1st May	31st Apr	0	1	yes		Climate Change and Natural Hazards in the Senegal River Basin: Dynamics of Hydrological Extremes in the Faleme River Basin	Start of rainy season
88	Syria	SY	1st Sep	31st Aug	0	1	yes		Hydrological Climate Change Impact Analysis for the Figeh Spring near Damascus, Syria	No reason given
89	Cambodia	KH	1st May	30th Apr	0	1	yes		Quantifying changes in flooding and habitats in the Tonle Sap Lake (Cambodia) caused by water infrastructure development and climate change in the Mekong Basin	No reason given
90	Uruguay	UY	1st Jul	30th Jun	3	2	yes		Hydrologic Impacts of Afforestation in Uruguay, A 20-Year Paired Watershed Study	No reason given
		UY	1st Apr	31st Mar	3	2	yes		Runoff modifications due to the conversion of natural grasslands to forests in a large basin in Uruguay	Seasonal change
91	Suriname	SR	1st Nov	31st Oct	0	1	no		Changes and variation in the discharge regime of the Upper Suriname River Basin and its relationship with the tropical Pacific and Atlantic SST anomalies	Minimum discahrge in November	Does not directly reference water year, estimated from discharge patterns
92	Tunisia	TN	1st Aug	31st Jul	1	2	yes		Groundwater resources in Maknassy basin (central Tunisia): hydrological data analysis and water budgeting	Convention for groundwater
		TN	1st Sep	31st Aug	1	2	yes		Hydrological Modeling in Northern Tunisia with Regional Climate Model Outputs: Performance Evaluation and Bias-Correction in Present Climate Conditions	No reason given
93	Bangladesh	BD	1st Apr	31st Mar	0	1	yes		Modeling the changes in water balance components of the highly irrigated western part of Banglades	No reason given
94	Nepal	NP	1st Apr	31st Mar	0	1	yes		Water budget on the Dudh Koshi River (Nepal): Uncertainties on precipitation	Follows the definiton of the Department of Hydrology and Meteorology of Nepal
95	Greece	GR	1st Sep	31st Aug	0	1	yes		Response of the water balance in Greece to temperature and precipitation trends	Ensures that winter rains of one winter are put into same year
96	Nicaragua	NI	1st Jun	31st May	0	1	yes		Hydrology Affects Environmental and Spatial Structuring of Microalgal Metacommunities in Tropical Pacific Coast Wetlands	Start of the rainy season
97	North Korea	KP	1st Apr	31st Mar	0	1	yes		Decreasing or increasing trends? Evidence of long-term change in river discharge over the northern Korean Peninsula, 1951–2010	No reason given
98	Malawi	MW	1st Nov	31st Oct	0	1	yes		Long-term variations in the net inflow record for Lake Malawi	No reason given
99	Eritrea	ER	1st Jun	31st May	0	1	no		Indian Ocean sea surface temperature and Eritrean highlands rainfall	Start of the rainy season	Does not directly reference water year, estimated from rainfall patterns
100	Benin	BJ	1st Nov	31st Oct	2	2	yes		Modelling the forest and woodland-irrigation nexus in tropical Africa: A case study in Benin	Start of the dry season
			1st Jan	31st Dec	2	2	yes		Comparing water quantity and quality in three inland valley watersheds with different levels of agricultural development in central Benin	No reason given
113	Austria	AT	1st Oct	30th Sep	0	1	yes		LamaH-CE: LArge-SaMple DAta for Hydrology and Environmental Sciences for Central Europe	No reason given
132	Switzerland	CH	1st Oct	30th Sep	0	1	yes		CAMELS-CH: hydro-meteorological time series and landscape attributes for 331 catchments in hydrologic Switzerland	No reason given

## Sheet: Sheet2
		JoH	WRR	HESS	nature water	GRL
Aims and Scope		all the subfields of the hydrological sciences	hydrology and water resources	Encourages and supports fundamental and applied research that advances the understanding of hydrological systems	evolving relationship between society and water resources	high-impact, innovative, and timely research on major scientific advances in all the major geoscience disciplines
		physical ... aspects of surface and groundwater hydrology, hydrometeorology …	natural ... sciences	role in providing water for ecosystems and society	natural sciences, primarily Earth and environmental science	communications-length articles and should have broad and immediate implications in their discipline or across the geosciences
		incorporating the insights and methodologies of disciplines such as climatology, water resource systems	physical ... processes in water resources research and management,	role of the water cycle in the functioning of the Earth system	studies that will have an impact on fundamental understanding,	methods manuscript introducing an innovative technique that makes new science advance possible, with immediate applications to AGU disciplines
		Journal of Hydrology is relevant to catchment scales	observational, experimental, theoretical, analytical, numerical, and data-driven approaches that advance the science of water and its management	governing processes of the water cycle	potential for policy implementation.
			novelty, accuracy, significance, and broader implications of the findings	physical ... processes in the cycling of continental water in all its phases … at all scales … the global-scale processes underpinning hydro-climatology
				spatial and temporal characteristics of the global water resources (solid, liquid, and vapour) and related budgets, in all compartments of the Earth system
Papers	Title, abstract, keywords: "water year"	79	1,188 (abstract)	441 (title and abstract)	20 (title)	884
	Vibe	Mostly snow and snow melt in the US and California	One dedicated water Year study otherwise more involved in the analysis	No dedicated study but regional studies about evapotranspiration and stuff	No dedicated study but lot of climate extremes and stuff analysis
Priority		3	1	2	5	4
